# Supplementary material for: Hydrogen Sulfide Mediates Tumor Cell Resistance to Thioredoxin Inhibitor
Source: PubMed Central journal article supplement (PMC7078679; doi:10.3389/fonc.2020.00252), 2020-03-10
Supplement: Image_1.pdf [file Image_1.pdf]

## Supplementary Figure 1

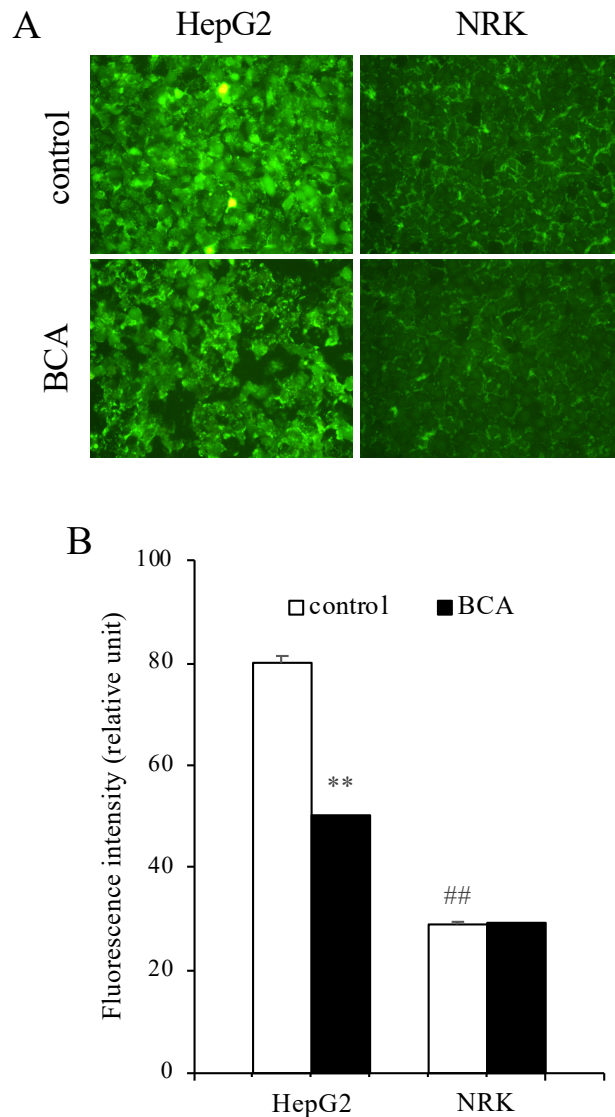

*Fig. S1 Comparison of H<sub>2</sub>S production between HepG2 and NRK cells.* (A) Fluorescent images of HepG2 and NRK cells after incubation with HSip-1 DA. HepG2 and NRK cells were incubated with or without 2 mM BCA for 12 h. Afterward, cells were incubated with H<sub>2</sub>S detection probe HSip-1 DA (5  $\mu$ M) for 30 min. After washing out the probe, cells were maintained in HBSS and photographed (magnification:  $\times$  400). (B) Quantification of relative fluorescence intensity using ImageJ software. Data shown are mean  $\pm$  S.E. (n = 25), \*\* P < 0.01 vs. control, ## P < 0.01 vs. HepG2 cells.
